# Supplementary material
Source: Springer Nature journal article supplement (https://www.springermedizin.de/resource/supplementary/12913_2014_3200_MOESM1_ESM.pdf/9532654)
Supplement: MOESM1 [file 9532654]

101 Non-duplicate abstracts found

60 Articles excluded for failing to meet inclusion criteria after reading title and abstract

43 Potential articles identified

22 Articles excluded for failing to meet inclusion criteria after full reading

19 Articles included
